# Supplementary material for: Metabolomic and Lipid Alterations are Associated with Longitudinal Neurological Performance in Multiple Sclerosis
Source: Research Square preprint supplement (doi:10.21203/rs.3.rs-7078057/v1), 2025-07-22
Supplement: Supplementary file 1 [file 148024570af2596c9294ba25.xlsx]

## Sheet: Supplementary data1
The MDT_results.Significant metabolites associated with MDT at FDR-P<0.05
No	Metabolite	Met_ID	Class	NPT	Coefficient	Std_Error	P_Value	Adj.P_Value
1	Eicosapentaenoic.acid	EPA	Fatty acids	mdt_avg_log	-0.0354456	0.00693548	3.20856e-07	8.29414e-05
2	Phosphatidyl.choline.aa.C36.5	PC aa C36:5	Phosphatidyl-cholines	mdt_avg_log	-0.0529872	0.0101863	1.97357e-07	8.29414e-05
3	Phosphatidyl.choline.aa.C36.6	PC aa C36:6	Phosphatidyl-cholines	mdt_avg_log	-0.0551904	0.0110272	5.58824e-07	9.6304e-05
4	Phosphatidyl.choline.ae.C38.0	PC ae C38:0	Phosphatidyl-cholines	mdt_avg_log	-0.0734618	0.0153762	1.77381e-06	0.000229265
5	Triacylglyceride..20.4_34.2.	TG(20:4_34:2)	Triglycerides	mdt_avg_log	0.0447284	0.00972175	4.20747e-06	0.000362544
6	Triacylglyceride..22.4_34.2.	TG(22:4_34:2)	Triglycerides	mdt_avg_log	0.0419377	0.00909994	4.05446e-06	0.000362544
7	Cholesteryl.ester.20.5	CE(20:5)	Cholesteryl esters	mdt_avg_log	-0.0346914	0.00790336	1.1364e-05	0.000839312
8	Triacylglyceride..20.4_36.3.	TG(20:4_36:3)	Triglycerides	mdt_avg_log	0.0426477	0.0105433	5.23225e-05	0.00338134
9	Triacylglyceride..20.4_36.2.	TG(20:4_36:2)	Triglycerides	mdt_avg_log	0.0463639	0.0118366	8.96555e-05	0.00515021
10	Triacylglyceride..18.2_38.4.	TG(18:2_38:4)	Triglycerides	mdt_avg_log	0.0357418	0.00962784	0.000205354	0.00965163
11	Triacylglyceride..20.4_34.1.	TG(20:4_34:1)	Triglycerides	mdt_avg_log	0.0396473	0.010648	0.000196523	0.00965163
12	Docosahexaenoic.acid	DHA	Fatty acids	mdt_avg_log	-0.0274544	0.0077352	0.00038628	0.0166422
13	Triacylglyceride..18.2_34.2.	TG(18:2_34:2)	Triglycerides	mdt_avg_log	0.0287909	0.0083552	0.000569236	0.0186534
14	Triacylglyceride..20.3_34.2.	TG(20:3_34:2)	Triglycerides	mdt_avg_log	0.0342747	0.00990819	0.000541715	0.0186534
15	Triacylglyceride..20.4_33.2.	TG(20:4_33:2)	Triglycerides	mdt_avg_log	0.0332041	0.00957819	0.000527019	0.0186534
16	Triacylglyceride..20.4_36.4.	TG(20:4_36:4)	Triglycerides	mdt_avg_log	0.0310656	0.00902527	0.000577282	0.0186534
17	Triacylglyceride..20.4_35.3.	TG(20:4_35:3)	Triglycerides	mdt_avg_log	0.0329745	0.00965437	0.00063666	0.0193619
18	Phosphatidyl.choline.aa.C36.0	PC aa C36:0	Phosphatidyl-cholines	mdt_avg_log	-0.0425155	0.012607	0.000745207	0.0207003
19	Phosphatidyl.choline.aa.C40.4	PC aa C40:4	Phosphatidyl-cholines	mdt_avg_log	0.0582814	0.0173112	0.000760746	0.0207003
20	Triacylglyceride..20.4_34.3.	TG(20:4_34:3)	Triglycerides	mdt_avg_log	0.0314692	0.00944694	0.000864889	0.0223574
21	Docosahexaenoic.acid..DHA..omega.3.FA.22.6..	DHA	Eicosanoids	mdt_avg_log	-0.0244504	0.00744086	0.00101634	0.0250214
22	Tryptophan	Trp	Amino acids	mdt_avg_log	-0.071956	0.0220225	0.00108545	0.025508
23	Triacylglyceride..20.0_32.4.	TG(20:0_32:4)	Triglycerides	mdt_avg_log	0.0267559	0.00823471	0.00115744	0.0260172
24	Triacylglyceride..16.0_38.5.	TG(16:0_38:5)	Triglycerides	mdt_avg_log	0.0330465	0.0103454	0.00140157	0.0289846
25	Triacylglyceride..18.2_35.2.	TG(18:2_35:2)	Triglycerides	mdt_avg_log	0.0288586	0.00900187	0.00134669	0.0289846
26	Triacylglyceride..20.4_34.0.	TG(20:4_34:0)	Triglycerides	mdt_avg_log	0.0312397	0.00987321	0.00155573	0.0309351
27	Triacylglyceride..16.0_36.4.	TG(16:0_36:4)	Triglycerides	mdt_avg_log	0.0267165	0.00854893	0.00177729	0.0340317
28	Triacylglyceride..16.0_36.3.	TG(16:0_36:3)	Triglycerides	mdt_avg_log	0.0309951	0.0100181	0.0019754	0.0356065
29	Triacylglyceride..18.2_34.1.	TG(18:2_34:1)	Triglycerides	mdt_avg_log	0.0309337	0.0100088	0.00199727	0.0356065
30	X13S.Hydroxyocta.decadienoic.acid..13S.HODE.	13S-HODE	Eicosanoids	mdt_avg_log	-0.0245828	0.00798668	0.00208414	0.0359166
31	Triacylglyceride..18.2_38.5.	TG(18:2_38:5)	Triglycerides	mdt_avg_log	0.0292229	0.00978926	0.00283389	0.047262
32	Phosphatidyl.choline.aa.C38.0	PC aa C38:0	Phosphatidyl-cholines	mdt_avg_log	-0.0482822	0.0164024	0.00324413	0.0493299
33	Triacylglyceride..17.0_36.4.	TG(17:0_36:4)	Triglycerides	mdt_avg_log	0.0280408	0.00951672	0.00321412	0.0493299
34	Triacylglyceride..18.2_33.2.	TG(18:2_33:2)	Triglycerides	mdt_avg_log	0.0237087	0.00803325	0.00316422	0.0493299

## Sheet: Supplementary data2
The WST_results.Significant metabolites associated with WST at FDR-P<0.05
No	Metabolite	Met_id	Class	MSPT	Coefficient	Std_Error	P_Value	Adj.P_Value
1	Phosphatidyl.choline.aa.C36.6	PC aa C36:6	Phosphatidyl-cholines	wst_avg_log	-0.0977269	0.0145266	1.72683e-11	8.92771e-09
2	Phosphatidyl.choline.ae.C38.0	PC ae C38:0	Phosphatidyl-cholines	wst_avg_log	-0.136357	0.0206657	4.16128e-11	1.07569e-08
3	Phosphatidyl.choline.aa.C36.5	PC aa C36:5	Phosphatidyl-cholines	wst_avg_log	-0.0884933	0.013685	1.00346e-10	1.7293e-08
4	Cholesteryl.ester.20.5	CE(20:5)	Cholesteryl esters	wst_avg_log	-0.061756	0.0115982	1.01177e-07	1.30771e-05
5	Sarcosine	Sarcosine	Amino acid related	wst_avg_log	-0.0980474	0.0193712	4.15987e-07	4.30131e-05
6	Phosphatidyl.choline.aa.C38.6	PC aa C38:6	Phosphatidyl-cholines	wst_avg_log	-0.0931612	0.0196	2.00286e-06	0.00017258
7	Eicosapentaenoic.acid	EPA	Fatty acids	wst_avg_log	-0.0496518	0.0108417	4.65643e-06	0.00034391
8	Phosphatidyl.choline.aa.C36.0	PC aa C36:0	Phosphatidyl-cholines	wst_avg_log	-0.0805458	0.0178672	6.5435e-06	0.000422873
9	Cholesteryl.ester.14.0	CE(14:0)	Cholesteryl esters	wst_avg_log	-0.0848203	0.019115	9.10693e-06	0.000523143
10	Phosphatidyl.choline.ae.C30.0	PC ae C30:0	Phosphatidyl-cholines	wst_avg_log	-0.0976503	0.022377	1.27784e-05	0.000660642
11	Phosphatidyl.choline.aa.C30.0	PC aa C30:0	Phosphatidyl-cholines	wst_avg_log	-0.090989	0.0214617	2.23916e-05	0.0010524
12	Lysophosphatidyl.choline.a.C14.0	lysoPC a C14:0	Lysophosphatidyl-cholines	wst_avg_log	-0.0757225	0.0182475	3.32831e-05	0.00143395
13	Docosahexaenoic.acid	DHA	Fatty acids	wst_avg_log	-0.0471901	0.0114379	3.695e-05	0.00146947
14	Phosphatidyl.choline.aa.C42.6	PC aa C42:6	Phosphatidyl-cholines	wst_avg_log	-0.0905379	0.0222732	4.80558e-05	0.00165632
15	Triacylglyceride..22.6_32.1.	TG(22:6_32:1)	Triglycerides	wst_avg_log	-0.0384023	0.00942891	4.6447e-05	0.00165632
16	Tryptophan	Trp	Amino acids	wst_avg_log	-0.126575	0.0322504	8.68178e-05	0.0028053
17	Phosphatidyl.choline.ae.C42.2	PC ae C42:2	Phosphatidyl-cholines	wst_avg_log	-0.111131	0.0285083	9.69156e-05	0.00294737
18	Hexosylceramide..d16.1.20.0.	HexCer(d16:1/20:0)	Hexosylceramides	wst_avg_log	-0.0635873	0.0164801	0.000114121	0.0032778
19	Phosphatidyl.choline.ae.C42.3	PC ae C42:3	Phosphatidyl-cholines	wst_avg_log	-0.104291	0.0272056	0.000126369	0.00343857
20	Phosphatidyl.choline.ae.C34.2	PC ae C34:2	Phosphatidyl-cholines	wst_avg_log	-0.101789	0.0271428	0.000176756	0.00456915
21	Phosphatidyl.choline.aa.C38.0	PC aa C38:0	Phosphatidyl-cholines	wst_avg_log	-0.0830202	0.022531	0.000228962	0.00458187
22	Phosphatidyl.choline.ae.C34.0	PC ae C34:0	Phosphatidyl-cholines	wst_avg_log	-0.0937696	0.0254595	0.000230423	0.00458187
23	Phosphatidyl.choline.ae.C36.1	PC ae C36:1	Phosphatidyl-cholines	wst_avg_log	-0.10516	0.0282676	0.000199088	0.00458187
24	Phosphatidyl.choline.ae.C40.1	PC ae C40:1	Phosphatidyl-cholines	wst_avg_log	-0.0977568	0.0262625	0.000197417	0.00458187
25	Triacylglyceride..20.5_36.2.	TG(20:5_36:2)	Triglycerides	wst_avg_log	-0.0450555	0.0121507	0.000208862	0.00458187
26	Triacylglyceride..22.6_34.1.	TG(22:6_34:1)	Triglycerides	wst_avg_log	-0.0389228	0.0105268	0.000217747	0.00458187
27	Lysophosphatidyl.choline.a.C18.1	lysoPC a C18:1	Lysophosphatidyl-cholines	wst_avg_log	-0.0790929	0.0215816	0.000247506	0.00473928
28	Ceramide..d16.1.24.0.	Cer(d16:1/24:0)	Ceramides	wst_avg_log	-0.0668913	0.0184009	0.000277743	0.00512833
29	Phosphatidyl.choline.ae.C34.3	PC ae C34:3	Phosphatidyl-cholines	wst_avg_log	-0.0894178	0.0247591	0.000304412	0.00542692
30	Asparagine	Asn	Amino acids	wst_avg_log	-0.122908	0.0344286	0.000357042	0.00595454
31	Docosahexaenoic.acid..DHA..omega.3.FA.22.6..	DHA	Eicosanoids	wst_avg_log	-0.0397172	0.0111211	0.000355154	0.00595454
32	Phosphatidyl.choline.ae.C40.2	PC ae C40:2	Phosphatidyl-cholines	wst_avg_log	-0.0947611	0.0266187	0.000370928	0.00599281
33	Phosphatidyl.choline.ae.C40.6	PC ae C40:6	Phosphatidyl-cholines	wst_avg_log	-0.0937642	0.0265116	0.00040512	0.00634688
34	Trigonelline	Trigonelline	Alkaloids	wst_avg_log	-0.0187511	0.00532911	0.000433819	0.00640812
35	Ceramide..d16.1.23.0.	Cer(d16:1/23:0)	Ceramides	wst_avg_log	-0.06044	0.0171549	0.000426367	0.00640812
36	Phosphatidyl.choline.aa.C42.2	PC aa C42:2	Phosphatidyl-cholines	wst_avg_log	-0.0966059	0.0275789	0.000460237	0.00660951
37	Histidine	His	Amino acids	wst_avg_log	-0.129066	0.0369494	0.000477542	0.00667268
38	Triacylglyceride..20.5_34.0.	TG(20:5_34:0)	Triglycerides	wst_avg_log	-0.0373238	0.0107242	0.000500771	0.00681312
39	Hippuric.acid	HipAcid	Carboxylic acids	wst_avg_log	-0.0285475	0.00822871	0.000521909	0.00691865
40	Phosphatidyl.choline.ae.C36.0	PC ae C36:0	Phosphatidyl-cholines	wst_avg_log	-0.0945446	0.0274488	0.000572341	0.00739751
41	Phosphatidyl.choline.aa.C34.1	PC aa C34:1	Phosphatidyl-cholines	wst_avg_log	-0.0845667	0.0246839	0.000612572	0.00772438
42	Phosphatidyl.choline.aa.C32.2	PC aa C32:2	Phosphatidyl-cholines	wst_avg_log	-0.0561379	0.0164454	0.000641141	0.00789213
43	Phosphatidyl.choline.ae.C34.1	PC ae C34:1	Phosphatidyl-cholines	wst_avg_log	-0.105004	0.0309889	0.000702929	0.00839094
44	Choline	Choline	Vitamins and cofactors	wst_avg_log	-0.0898618	0.0265541	0.000714123	0.00839094
45	Triacylglyceride..22.6_32.0.	TG(22:6_32:0)	Triglycerides	wst_avg_log	-0.0308413	0.00915962	0.000759647	0.0087275
46	Ceramide..d16.1.20.0.	Cer(d16:1/20:0)	Ceramides	wst_avg_log	-0.0714882	0.0214289	0.000849747	0.00955042
47	Phosphatidyl.choline.ae.C32.2	PC ae C32:2	Phosphatidyl-cholines	wst_avg_log	-0.0973915	0.029568	0.000988368	0.0108625
48	Phosphatidyl.choline.ae.C44.3	PC ae C44:3	Phosphatidyl-cholines	wst_avg_log	-0.0929235	0.0282602	0.00100851	0.0108625
49	Phosphatidyl.choline.ae.C38.6	PC ae C38:6	Phosphatidyl-cholines	wst_avg_log	-0.0859459	0.0264456	0.00115437	0.0121798
50	Phosphatidyl.choline.ae.C36.3	PC ae C36:3	Phosphatidyl-cholines	wst_avg_log	-0.0917681	0.0283506	0.00120835	0.0124943
51	Phosphatidyl.choline.ae.C36.2	PC ae C36:2	Phosphatidyl-cholines	wst_avg_log	-0.0889179	0.0275761	0.00126215	0.0127948
52	Phosphatidyl.choline.aa.C34.4	PC aa C34:4	Phosphatidyl-cholines	wst_avg_log	-0.0539402	0.0167696	0.0012974	0.0128992
53	Triacylglyceride..20.5_34.1.	TG(20:5_34:1)	Triglycerides	wst_avg_log	-0.0367443	0.0115215	0.00142675	0.0136598
54	Triacylglyceride..22.4_34.2.	TG(22:4_34:2)	Triglycerides	wst_avg_log	0.0383924	0.0120311	0.00141734	0.0136598
55	Phosphatidyl.choline.aa.C32.0	PC aa C32:0	Phosphatidyl-cholines	wst_avg_log	-0.094404	0.0297664	0.00151654	0.0142555
56	Phosphatidyl.choline.aa.C34.3	PC aa C34:3	Phosphatidyl-cholines	wst_avg_log	-0.0647224	0.0205434	0.00162978	0.0150463
57	Methionine	Met	Amino acids	wst_avg_log	-0.0850911	0.0273092	0.00183423	0.0166367
58	Phosphatidyl.choline.aa.C28.1	PC aa C28:1	Phosphatidyl-cholines	wst_avg_log	-0.0850351	0.0277069	0.00214705	0.018814
59	Phosphatidyl.choline.aa.C40.2	PC aa C40:2	Phosphatidyl-cholines	wst_avg_log	-0.0855073	0.0278421	0.00213233	0.018814
60	Cholesteryl.ester.17.1	CE(17:1)	Cholesteryl esters	wst_avg_log	-0.0527963	0.0172335	0.002187	0.0188446
61	Cholesteryl.ester.22.6	CE(22:6)	Cholesteryl esters	wst_avg_log	-0.0471118	0.0155784	0.00249314	0.0207896
62	Phosphatidyl.choline.ae.C38.2	PC ae C38:2	Phosphatidyl-cholines	wst_avg_log	-0.074767	0.0246855	0.00245539	0.0207896
63	Phosphatidyl.choline.aa.C40.6	PC aa C40:6	Phosphatidyl-cholines	wst_avg_log	-0.0614275	0.0204034	0.00260694	0.0211071
64	Triacylglyceride..20.4_36.4.	TG(20:4_36:4)	Triglycerides	wst_avg_log	0.0382875	0.0127203	0.00261288	0.0211071
65	Cholesteryl.ester.17.0	CE(17:0)	Cholesteryl esters	wst_avg_log	-0.0561418	0.0186984	0.00267785	0.0212992
66	Hexosylceramide..d16.1.24.0.	HexCer(d16:1/24:0)	Hexosylceramides	wst_avg_log	-0.0533956	0.0178793	0.00282239	0.0214585
67	Lysophosphatidyl.choline.a.C16.0	lysoPC a C16:0	Lysophosphatidyl-cholines	wst_avg_log	-0.0812306	0.0271585	0.00278083	0.0214585
68	Triacylglyceride..22.6_34.3.	TG(22:6_34:3)	Triglycerides	wst_avg_log	-0.0283113	0.0094707	0.00279561	0.0214585
69	alpha.Amino.butyric.acid	AABA	Amino acid related	wst_avg_log	-0.0653296	0.0219775	0.0029532	0.0221276
70	Serotonin	Serotonin	Biogenic amines	wst_avg_log	-0.0227308	0.00766968	0.00303941	0.0224482
71	Sphingomyelin.C26.1	SM C26:1	Sphingomyelins	wst_avg_log	-0.0740408	0.0254743	0.00365504	0.0266149
72	Lysophosphatidyl.choline.a.C17.0	lysoPC a C17:0	Lysophosphatidyl-cholines	wst_avg_log	-0.0634825	0.0219781	0.0038716	0.0266883
73	Lysophosphatidyl.choline.a.C20.3	lysoPC a C20:3	Lysophosphatidyl-cholines	wst_avg_log	-0.0635292	0.0219282	0.00376572	0.0266883
74	Phosphatidyl.choline.aa.C40.3	PC aa C40:3	Phosphatidyl-cholines	wst_avg_log	-0.0875707	0.0302857	0.00383419	0.0266883
75	Triacylglyceride..20.4_36.3.	TG(20:4_36:3)	Triglycerides	wst_avg_log	0.0441517	0.0152667	0.00382766	0.0266883
76	Indolepropionic.acid	3-IPA	Indoles and derivatives	wst_avg_log	-0.0236772	0.00821594	0.00395337	0.0268933
77	Phosphatidyl.choline.aa.C42.5	PC aa C42:5	Phosphatidyl-cholines	wst_avg_log	-0.073141	0.0254445	0.00404629	0.027168
78	Ceramide..d18.1.26.1.	Cer(d18:1/26:1)	Ceramides	wst_avg_log	-0.0602802	0.0210303	0.00415241	0.027416
79	Phosphatidyl.choline.aa.C32.1	PC aa C32:1	Phosphatidyl-cholines	wst_avg_log	-0.041114	0.0143577	0.0041893	0.027416
80	Triacylglyceride..18.2_34.2.	TG(18:2_34:2)	Triglycerides	wst_avg_log	0.0329506	0.0115499	0.0043324	0.0279982
81	Ceramide..d18.1.14.0.	Cer(d18:1/14:0)	Ceramides	wst_avg_log	-0.0851348	0.0298918	0.00439808	0.0280717
82	Triacylglyceride..18.2_36.3.	TG(18:2_36:3)	Triglycerides	wst_avg_log	0.0300023	0.0106392	0.0048025	0.0302792
83	Diacylglyceride..18.2_18.2.	DG(18:2_18:2)	Diglycerides	wst_avg_log	0.0322433	0.0115664	0.00530897	0.0330691
84	Triacylglyceride..20.4_34.2.	TG(20:4_34:2)	Triglycerides	wst_avg_log	0.0353181	0.0127554	0.0056251	0.0346211
85	Hexosylceramide..d16.1.22.0.	HexCer(d16:1/22:0)	Hexosylceramides	wst_avg_log	-0.0584225	0.0212123	0.00588396	0.0346996
86	Hydroxysphingo.myelin.C22.2	SM (OH) C22:2	Sphingomyelins	wst_avg_log	-0.0788161	0.0286298	0.00590631	0.0346996
87	Triacylglyceride..18.2_36.4.	TG(18:2_36:4)	Triglycerides	wst_avg_log	0.0252614	0.00915215	0.0057773	0.0346996
88	Triacylglyceride..18.2_38.4.	TG(18:2_38:4)	Triglycerides	wst_avg_log	0.0378728	0.0137567	0.00590458	0.0346996
89	Cholesteryl.ester.16.1	CE(16:1)	Cholesteryl esters	wst_avg_log	-0.0450598	0.0169365	0.00780212	0.0453224
90	Cholesteryl.ester.18.1	CE(18:1)	Cholesteryl esters	wst_avg_log	-0.0568578	0.021449	0.00802929	0.0453835
91	Lysophosphatidyl.choline.a.C16.1	lysoPC a C16:1	Lysophosphatidyl-cholines	wst_avg_log	-0.0567304	0.0214168	0.00807598	0.0453835
92	Sphingomyelin.C26.0	SM C26:0	Sphingomyelins	wst_avg_log	-0.080425	0.0303238	0.00799666	0.0453835
93	Ceramide..d16.1.22.0.	Cer(d16:1/22:0)	Ceramides	wst_avg_log	-0.0527152	0.0200054	0.00841255	0.0467666
94	Phosphatidyl.choline.aa.C36.3	PC aa C36:3	Phosphatidyl-cholines	wst_avg_log	-0.0739764	0.0281983	0.00870483	0.0473657
95	Triacylglyceride..16.0_28.1.	TG(16:0_28:1)	Triglycerides	wst_avg_log	-0.0166227	0.00633063	0.0086456	0.0473657
96	Triacylglyceride..18.0_30.1.	TG(18:0_30:1)	Triglycerides	wst_avg_log	-0.0174837	0.00667338	0.00879517	0.0473657
97	Leucine	Leu	Amino acids	wst_avg_log	-0.0682084	0.0260818	0.00891812	0.0475327
98	Lysophosphatidyl.choline.a.C18.2	lysoPC a C18:2	Lysophosphatidyl-cholines	wst_avg_log	-0.0504931	0.0193862	0.00919848	0.0485267
99	Hexosylceramide..d18.1.26.0.	HexCer(d18:1/26:0)	Hexosylceramides	wst_avg_log	-0.0482382	0.0185651	0.00936792	0.0489214
100	Triacylglyceride..20.0_32.4.	TG(20:0_32:4)	Triglycerides	wst_avg_log	0.0294629	0.0113617	0.0095096	0.0491646
